# Supplementary material for: Nucleophilic additions of anionic Group 6 carbene complexes on cationic indenyl–ruthenium(II) allenylidene derivatives: an easy entry to bimetallic complexes containing σ-alkynyl–carbene and vinylidene–carbene bridges †
Source: Royal Society of Chemistry journal article supplement (doi:10.1039/a908493b), 2000-01-01
Supplement: a908493bt1.doc [file a908493bt1.doc]

**Table 1. 31P-{1H} and 1H NMR Data for Bimetallic -Alkynyl Complexes [Ru(C∫CC(R)Ph{CH2C(OMe)=M(CO)5})(5-C9H7)(PPh3)L] (6-10a-c)***a*

|  |  | |  | |  | | | | | | | | | | |  | | | |
| --- | --- | --- | --- | --- | --- | --- | --- | --- | --- | --- | --- | --- | --- | --- | --- | --- | --- | --- | --- |
|  |  | |  | | 5-C9H7 | | | |  | |  | |  | |  | | |  | |
| Complex | 31P-{1H} | | 2*J*(PP) | | H1,2,3 | | H4,5,6,7 | | CH2 | | OMe | | Others | |  | | |  | |
| **6a** | 54.47 (s) | |  | | 4.72 (d),*b* 5.37 (t)*b* | | 6.84 (m), *c* | | 5.23 (s) | | 3.54 (s) | | 7.06-7.97 (m, Ph) | |  | | |  | |
| **6b** | 54.87 (s) | |  | | 4.47 (d),*d* 5.12 (t)*d* | | 6.62 (m), *c* | | 4.79 (s) | | 3.06 (s) | | 6.81-7.76 (m, Ph) | |  | | |  | |
| **6c** | 54.62 (s) | |  | | 4.48 (d),*e* 5.13 (t)*e* | | 6.62 (m), *c* | | 4.93 (s) | | 3.14 (s) | | 6.81-7.76 (m, Ph) | |  | | |  | |
| **7a** | 51.71 (d), 52.85 (d) | | 30.1 | | 4.61 (bs), 4.70 (bs), 5.30 (m) | | 6.35 (m), *c*, *c* | | 3.85 (d)*f*, 4.13 (d)*f* | | 3.95 (s) | | 4.50 (br, CH), 6.80-7.84 (m, Ph) | |  | | |  | |
| **7b** | 52.04 (d), 53.22 (d) | | 32.0 | | 4.59 (bs), 4.68 (bs), 5.30 (m) | | 6.35 (m), *c*, *c* | | 3.62 (dd)*g*, 4.01 (dd)*h* | | 3.76 (s) | | 4.53 (m, CH), 6.76-7.46 (m, Ph) | |  | | |  | |
| **8a** | 41.28 (d), 54.56 (d) | | 34.1 | | 4.28 (bs), 4.78 (bs), 5.20 (m) | | *c*, *c*, *c*, *c* | | 4.97 (s) | | 3.90 (s) | | 1.10 [d, 2*J*(HP) = 9.8, PCH3], 6.50-7.60 (m, Ph) | |  | | |  | |
| **8b** | 41.34 (d), 54.56 (d) | | 34.5 | | 4.28 (bs), 4.78 (bs), 5.20 (m) | | *c*, *c*, *c*, *c* | | 4.74 (s) | | 3.70 (s) | | 1.07 [d, 2*J*(HP) = 9.8, PCH3], 6.52-7.60 (m, Ph) | |  | | |  | |
| **9a** | 39.01 (d), 54.37 (d)  39.01 (d), 54.29 (d) | | 31.5  33.7 | | 4.40 (bs), 4.81 (bs), 4.89 (bs), 5.26 (bs),  5.33 (bs) | | *c*, *c*, *c*, *c*  *c*, *c*, *c*, *c* | | *i* | | *i* | | 1.21 [d, 2*J*(HP) = 9.0, PCH3], 1.24 [d, 2*J*(HP) = 8.7, PCH3], 4.50 (m, CH), 6.45-7.80 (m, Ph) | |  | | |  | |
| **9b** | 39.32 (d), 54.50 (d)  39.40 (d), 54.59 (d) | | 32.5  32.5 | | 4.39 (bs), 4.82 (bs), 4.90 (bs), 5.27 (bs),  5.34 (bs) | | *c*, *c*, *c*, *c*  *c*, *c*, *c*, *c* | | *j* | | *j* | | 1.22 [d, 2*J*(HP) = 9.6, PCH3], 1.25 [d, 2*J*(HP) = 9.6, PCH3], 4.53 (m, CH), 6.46-7.75 (m, Ph) | |  | | |  | |
| **10a** | 24.72 (d), 56.15 (d) | | 33.8 | | 4.11 (bs), 4.58 (bs), 4.97 (m) | | *c*, *c*, *c*, *c* | | 4.91 (s) | | 3.96 (s) | | 0.84 [d, 2*J*(HP) = 9.6, PCH3], 1.11 [d, 2*J*(HP) = 9.2, PCH3], 6.64-7.70 (m, Ph) | |  | | |  | |
| **10b** | 24.97 (d), 56.42 (d) | 35.3 | | 4.12 (bs), 4.58 (bs), 4.98 (m) | | *c*, *c*, *c*, *c* | | 4.69 (s) | | 3.77 (s) | | 0.84 [d, 2*J*(HP) = 9.2, PCH3], 1.11 [d, 2*J*(HP) = 9.2, PCH3], 6.65-7.55 (m, Ph) | |  | | |  | |  |

*a* Spectra recorded in C6D6; ** in ppm and *J* in Hz. Abbreviations: s, singlet; bs, broad singlet; d, doublet; dd, doublet of doublets; m, multiplet. *b* *J*(HH) = 2.0. *c* Overlapped by aromatic protons. *d* *J*(HH) = 2.1. *e* *J*(HH) = 2.3. *f* *J*(HH) = 15.9. *g* *J*(HH) = 14.8, *J*(HH) = 5.6. *h* *J*(HH) = 14.8, *J*(HH) = 9.2. *i* 3.76-4.09 ppm (m, CH2 and OMe). *j* 3.50-3.98 ppm (m, CH2 and OMe).
