# Supplementary material for: Nucleophilic additions of anionic Group 6 carbene complexes on cationic indenyl–ruthenium(II) allenylidene derivatives: an easy entry to bimetallic complexes containing σ-alkynyl–carbene and vinylidene–carbene bridges †
Source: Royal Society of Chemistry journal article supplement (doi:10.1039/a908493b), 2000-01-01
Supplement: a908493bt2.doc [file a908493bt2.doc]

**Table 2. 13C-{1H} NMR Data for Bimetallic -Alkynyl Complexes [Ru(C∫CC(R)Ph{CH2C(OMe)=M(CO)5})(5-C9H7)(PPh3)L] (6-10a-c)***a*

|  | 5-C9H7 | | | | |  |  |  |  |  |  |  |  |
| --- | --- | --- | --- | --- | --- | --- | --- | --- | --- | --- | --- | --- | --- |
| Complex | C1,3 | C2 | C3a,7a | **(C3a,7a)*b* | C4,5,6,7 | Ru-C | C | C | CH2 | OMe | M=C | C∫O | Others |
| **6a** | 75.20 | 95.09 | 110.74 | -19.96 | 124.52  *c* | 97.74 (t)*d* | 115.83 | 52.16 | 76.43 | 68.38 | 359.98 | 217.84  224.33 | 126.70-150.04 (m, Ph) |
| **6b** | 75.08 | 94.86 | 110.71 | -19.99 | 124.45  *c* | 98.24 (t)*e* | 115.59 | 52.37 | 78.01 | 71.40 | 355.00 | 198.73  204.32 | 124.89-150.10 (m, Ph) |
| **6c** | 75.17 | 94.99 | 110.59 | -20.11 | 124.42  *c* | 97.43 (t)*f* | 115.75 | 52.02 | 76.42 | 70.04 | 352.10 | 206.97  214.34 | 125.62-149.92 (m, Ph) |
| **7a** | *g*  74.95 (d)*h* | *i* | 108.84  109.49 | -21.53 | *c*, *c*, *c*, *c* | *i* | 111.01 | 39.72 | *g* | 67.16 | 361.71 | 216.88  223.82 | 128.37-145.13 (m, Ph) |
| **7b** | 74.69 (d)*h*  74.99 (d)*h* | *j* | 108.92  109.40 | -21.54 | *c*, *c*, *c*, *c* | *j* | 111.06 | 39.94 | 74.72 | 69.94 | 335.99 | 197.82  203.85 | 123.31-145.07 (m, Ph) |
| **8a** | 73.03 (bs)  75.53 (d)*k* | 94.56 | 108.64  111.29 (d)*k* | -20.73 | *c*, *c*, *c*, *c* | 101.87 (dd)*l* | 113.57 | 52.39 | 76.48 | 67.94 | 306.81 | 217.69  224.17 | 14.98 [d, *J*(CP) = 32.9, PCH3], 124.08-149.57 (m, Ph) |
| **8b** | 72.33  72.93 | 93.88 | 108.20  110.60 | -21.30 | *c*, *c*, *c*, *c* | 101.61 (vt)*m* | 112.90 | 52.16 | 77.50 | 71.10 | 334.91 | 197.07  203.61 | 14.36 [d, *J*(CP) = 33.3, PCH3], 122.45-148.86 (m, Ph) |
| **9a** | *n* | *o* | 111.05 (d)*k*  111.66 (d)*k*  *o* |  | *c*, *c*, *c*, *c*  *c*, *c*, *c*, *c* | *o* | *p* | 40.00  40.21 | *n* | 67.70  67.85 | 362.14  362.44 | 217.52  217.61  224.46 | 14.49 [d, *J*(CP) = 33.0, PCH3], 14.90 [d, *J*(CP) = 33.0, PCH3], 122.69-145.93 (m, Ph) |
| **9b** | 72.86 (d)*h*  73.00 (d)*q* | 94.22 | 110.45 (d)*r*  111.02 (d)*s*  *t* |  | *c*, *c*, *c*, *c*  *c*, *c*, *c*, *c* | 99.01 (m) | *t* | 39.58  39.80 | 74.89  75.15 | 69.88  70.03 | 335.75  336.02 | 197.79  197.86  203.87  203.93 | 13.81 [d, *J*(CP) = 33.8, PCH3], 14.20 [d, *J*(CP) = 32.7, PCH3], 122.05-145.36 (m, Ph) |
| **10a** | 70.65 (dd)*u*  73.66 (d)*s* | 94.15 | 108.30  108.68 (d)*s* | -22.21 | *c*, *c*, *c*, *c* | 101.15 (dd)*v* | 111.82 | 51.61 | 75.89 | 67.33 | 359.78 | 217.07  223.55 | 17.23 [d, *J*(CP) = 29.4, PCH3], 17.87 [d, *J*(CP) = 32.7, PCH3], 122.53-148.99 (m, Ph) |
| **10b** | 70.64 (dd)*u*  73.68 (d)*s* | 94.14 | 108.31  108.67 (d)*q* | -22.21 | *c*, *c*, *c*, *c* | 101.48 (dd)*v* | 111.86 | 52.08 | 77.55 | 70.12 | 334.70 | 197.97  203.63 | 17.28 [d, *J*(CP) = 29.4, PCH3], 17.90 [d, *J*(CP) = 32.8, PCH3], 122.55-148.93 (m, Ph) |

*a* Spectra recorded in C6D6; ** in ppm and *J* in Hz. Abbreviations: s, singlet; bs, broad singlet; d, doublet; t, triplet; vt, virtual triplet; m, multiplet. *b* **(C3a,7a) = **[C3a,7a(-indenyl complex)] - **[C3a,7a(sodium indenyl)], **(C3a,7a) for sodium indenyl 130.70 ppm. *c* Overlapped by aromatic carbons. *d* 2*J*(CP) = 23.3. *e* 2*J*(CP) = 24.0. *f* 2*J*(CP) = 25.1. *g* 74.70 (m, CH2 and C-1 or C-3). *h* 2*J*(CP) = 5.4. *i* 95.01 (m, C-2 and Ru-C). *j* 95.04 (m, C-2 and Ru-C). *k* 2*J*(CP) = 2.4. *l* 2*J*(CP) = 25.6, 2*J*(CP) = 21.9. *m J*(CP) = 2*J*(CP´) = 23.8. *n* 73.61 (m, C-1, C-3 and CH2). *o* 94.80 (m, C-2 and Ru-C). *p* 107.60, 108.16, 109.11 and 109.40 (s, C-3a, C-7a and C). *q* 2*J*(CP) = 4.4. *r* 2*J*(CP) = 2.2. *s* 2*J*(CP) = 3.3. *t* 106.97, 107.52, 108.49 and 108.73 (s, C-3a, C-7a and C). *u* 2*J*(CP) = 6.5, 2*J*(CP) = 2.2. *v* 2*J*(CP) = 26.2, 2*J*(CP) = 21.8.
