# Supplementary material for: Nucleophilic additions of anionic Group 6 carbene complexes on cationic indenyl–ruthenium(II) allenylidene derivatives: an easy entry to bimetallic complexes containing σ-alkynyl–carbene and vinylidene–carbene bridges †
Source: Royal Society of Chemistry journal article supplement (doi:10.1039/a908493b), 2000-01-01
Supplement: a908493bt3.doc [file a908493bt3.doc]

**Table 3. 31P-{1H} and 1H NMR Data for Bimetallic Vinylidene Complexes [Ru(=C=C(H)C(R)Ph{CH2C(OMe)=M(CO)5})(5-C9H7)(PPh3)L][BF4] (11-15a-c)***a*

|  |  | | |  |  | | | | | | | | | | | | | | | | | | | | | | |  | | | | | |
| --- | --- | --- | --- | --- | --- | --- | --- | --- | --- | --- | --- | --- | --- | --- | --- | --- | --- | --- | --- | --- | --- | --- | --- | --- | --- | --- | --- | --- | --- | --- | --- | --- | --- |
|  |  | | |  | 5-C9H7 | | | | | |  | | |  | | | | |  | |  | | |  | | | | |  | | | | |
| C**omplex** | **31P**-**{1H}** | 2***J***(**PP**) | H**1,2,3** | | | H**4,5,6,7** | | Ru=C=C**H** | **CH2** | | | | ***J***(HH) | | **OMe** | | O**thers** | | |  | | |  | | | | | | | | | |  |
| **11a** | **37.66 (s)** |  | **5.04 (t),*b* 5.37 (d)*b,c*** | | | **5.37 (m), *d*** | | **6.36 (s)** | **4.39 (s)** | | | |  | | **4.33 (s)** | | **6.71-7.68 (m, Ph)** | | |  | | |  | | | | | | | | | |  |
| **11b** | 37.70 (s) | | |  | 5.09 (t),*b* 5.34 (d)*b,c* | | 5.34 (m), *d* | | | | 6.39 (s) | | | 4.11 (s) | | | | |  | | 4.20 (s) | | | | 6.70-7.68 (m, Ph) | | | | |  |  |  | |
| **11c** | 37.69 (s) | | |  | 5.07 (t),*e* 5.35 (d)*e,c* | | 5.35 (m), *d* | | | | 6.36 (s) | | | 4.29 (s) | | | | |  | | 4.27 (s) | | | | 6.70-7.64 (m, Ph) | | | | |  |  |  | |
| **12a** | 37.32 (d), 40.60 (d) | | | 22.5 | 5.14 (bs), 5.56 (bs), 5.87 (m)*c* | | 5.69 (d),*f* 5.87 (m), *d*, *d* | | | | 4.44 (d)*g* | | | 3.38 (dd),*h* 3.68 (dd)*g* | | | | | 15.3 | | 4.70 (s) | | | | 3.98 (m, CH), 6.46-7.49 (m, Ph) | | | | |  |  |  | |
| **12b** | 37.34 (d), 40.64 (d) | | | 23.0 | 5.15 (bs), 5.56 (bs), 5.88 (m)*c* | | 5.70 (d),*f* 5.88 (m), *d*, *d* | | | | 4.49 (d)*i* | | | 3.18 (dd),*j* 3.56 (dd)*k* | | | | | 15.3 | | 4.52 (s) | | | | 3.98 (m, CH), 6.46-7.49 (m, Ph) | | | | |  |  |  | |
| **13a** | 20.55 (d), 40.51 (d) | | | 24.4 | 5.18 (bs), 5.31 (m),*c* 6.03 (bs) | | 5.31 (m), *d*, *d*, *d* | | | | 4.67 (s) | | | 4.10 (d), 4.72 (d) | | | | | 16.0 | | 4.14 (s) | | | | 1.67 [d, 2***J***(H**P**) = 9.3, PCH3], 6.25-7.53 (m, Ph) | | | | |  |  |  | |
| **13b** | 20.56 (d), 40.63 (d) | | | 25.0 | 5.16 (bs), 5.32 (m),*c* 6.06 (bs) | | 5.32 (m), *d*, *d*, *d* | | | | 4.75 (s) | | | 3.76 (d), 4.54 (d) | | | | | 17.8 | | 3.98 (s) | | | | 1.69 [d, 2***J***(H**P**) = 9.3, PCH3], 6.29-7.57 (m, Ph) | | | | |  |  |  | |
| **14a** | 23.90 (d), 40.81 (d)  24.27 (d), 44.43 (d) | | | 25.1  25.2 | 5.25 (bs), 5.30 (bs), 5.49 (bs), 5.59 (bs), 5.70 (bs), 5.81 (bs) | | 5.77 (d),*l* 5.94 (d),*g* *d*, *d*, *d*, *d*, *d*, *d* | | | | 4.32 (d)*m*  4.63 (dd)*n* | | | *o* | | | | |  | | 4.68 (s)  4.69 (s) | | | | 1.22 [d, 2***J***(H**P**) = 7.0, PCH3], 1.41 [d, 2***J***(H**P**) = 8.6, PCH3], 3.99 (m, CH), 4.10 (m, CH), 6.45-7.59 (m, Ph) | | | | |  |  |  | |
| **14b** | 23.83 (d), 40.77 (d)  24.08 (d), 44.30 (d) | | | 25.4  25.6 | 5.22 (bs), 5.27 (bs), 5.45 (bs), 5.54 (bs), 5.68 (bs), 5.76 (m)*c* | | 5.76 (m), 5.94 (d),*m* *d*, *d*, *d*, *d*, *d*, *d* | | | | 4.36 (d)*m*  4.67 (dd)*p* | | | *q* | | | | |  | | 4.52 (s) | | | | 1.18 [d, 2***J***(H**P**) = 10.8, PCH3], 1.39 [d, 2***J***(H**P**) = 9.2, PCH3], 3.97 (m, CH), 4.09 (m, CH), 6.45-7.58 (m, Ph) | | | | |  |  |  | |
| **15a** | 3.70 (d), 42.09 (d) | | | 28.3 | 5.24 (bs), 5.44 (bs), 5.88 (bs) | | 5.72 (d),*m* *d*, *d*, *d* | | | | 4.72 (s) | | | 4.42 (d), 4.67 (d) | | | | | 17.9 | | 4.32 (s) | | | | 1.31 [m, P(CH3)2], 6.50-7.50 (m, Ph) | | | | |  |  |  | |
| **15b** | 3.43 (d), 42.05 (d) | 27.7 | 5.19 (bs), 5.49 (bs), 5.90 (bs) | | | 5.70 (d),*m* *d*, *d*, *d* | | | | 4.81 (s) | | 4.09 (d), 4.48 (d) | | | | 17.9 | | 4.16 (s) | | | | 1.33 [d, 2***J***(H**P**) = 9.6, PCH3], 1.35 [d, 2***J***(H**P**) = 10.0, PCH3], 6.50-7.50 (m, Ph) | | | |  |  | | | | | | |

*a* Spectra recorded in CDCl3; ** in ppm and *J* in Hz. Abbreviations: s, singlet; bs, broad singlet; d, doublet; dd, doublet of doublets; m, multiplet. *b* ***J***(HH) = 1.5. *c* Overlapped by H4,5,6,7 protons. *d* Overlapped by aromatic protons. *e* ***J***(HH) = 1.4. *f* ***J***(HH) = 8.2. *g* ***J***(HH) = 8.7. *h* ***J***(HH) = 6.0. *i* ***J***(HH) = 12.3. *j* ***J***(HH) = 5.9. *k* ***J***(HH) = 8.8. *l* ***J***(HH) = 9.2. *m* ***J***(HH) = 8.3. *n* ***J***(HH) = 9.1, ***J***(HH) = 2.6. *o* 3.34-3.87 ppm (m). *p* ***J***(HH) = 9.4, ***J***(HH) = 2.4. *q* 3.17-3.75 ppm (m).
