# Supplementary material for: Nucleophilic additions of anionic Group 6 carbene complexes on cationic indenyl–ruthenium(II) allenylidene derivatives: an easy entry to bimetallic complexes containing σ-alkynyl–carbene and vinylidene–carbene bridges †
Source: Royal Society of Chemistry journal article supplement (doi:10.1039/a908493b), 2000-01-01
Supplement: a908493bt4.doc [file a908493bt4.doc]

**Table 4. 13C-{1H} NMR Data for Bimetallic Vinylidene Complexes [Ru(=C=C(H)C(R)Ph{CH2C(OMe)=M(CO)5})(5-C9H7)(PPh3)L][BF4] (11-15a-c)***a*

|  | 5-C9H7 | | | | |  |  |  |  |  |  |  |  |
| --- | --- | --- | --- | --- | --- | --- | --- | --- | --- | --- | --- | --- | --- |
| Complex | C1,3 | C2 | C3a,7a | **(C3a,7a)*b* | C4,5,6,7 | Ru=C | C | C | CH2 | OMe | M=C | C∫O | Others |
| **11a** | 80.45 | 98.98 | 119.08 | -11.62 | 123.64  *c* | 344.08 (t)*d* | 117.60 | 50.02 | 73.74 | 68.08 | 361.79 | 216.25  223.54 | 126.96-146.89 (m, Ph) |
| **11b** | 81.31 | 99.80 | 120.01 | -10.69 | 124.52  128.16 | 345.52 (t)*e* | 118.46 | 51.22 | 76.12 | 71.84 | 337.16 | 198.14  204.47 | 128.94-147.79 (m, Ph) |
| **11c** | 84.32 | 102.84 | 122.97 | -8.73 | 127.49  *c* | 348.44 (t)*f* | 121.43 | 53.77 | 77.32 | 73.93 | 358.15 | 206.45  214.63 | 127.82-150.82 (m, Ph) |
| **12a** | 82.88 (d)*g*  83.72 (d)*h* | 98.57 | 112.58  118.21 | -15.30 | 121.80  123.52  *c*, *c* | 342.80 (vt)*i* | 116.00 | 35.90 | 70.70 | 67.98 | 359.34 | 215.90  223.10 | 124.30-143.10 (m, Ph) |
| **12b** | 82.84 (d)*j*  83.66 (d)*j* | 98.57 | 112.57  118.25 | -15.29 | 121.76  124.29  *c*, *c* | 342.72 (vt)*k* | 116.00 | 35.98 | 72.58 | 70.45 | 333.08 | 196.88  203.28 | 127.57-143.02 (m, Ph) |
| **13a** | 79.53 (d)*l*  80.26 (d)*m* | 98.77 | 115.82  116.10 | -14.74 | 123.44  123.77  *c*, *c* | 342.15 (vt)*i* | 118.97 | 49.57 | 72.67 | 67.11 | 359.99 | 215.82  222.44 | 16.99 [d, *J*(CP) = 30.5, PCH3], 126.92-146.75 (m, Ph) |
| **13b** | 79.33 (d)*j*  80.34 (d)*n* | 98.68 | 115.90 | -14.80 | 123.47  123.61  *c*, *c* | 342.28 (vt)*o* | 118.88 | 49.89 | 74.59 | 69.81 | 333.76 | 196.80  202.70 | 16.95 [d, *J*(CP) = 31.7, PCH3], 126.86-146.70 (m, Ph) |
| **14a** | *p* | 97.69  98.07 | 111.13  114.08  115.30  116.34 |  | 121.83  123.07  123.60  124.30  *c*, *c*, *c*, *c* | 343.18 (m) | 114.97  115.20 | 35.49  36.12 | 70.52  71.30 | 67.88  67.97 | 359.14  359.25 | 215.90  223.04  223.16 | 14.62 [d, *J*(CP) = 37.0, PCH3], 17.09 [d, *J*(CP) = 32.7, PCH3], 126.90-143.13 (m, Ph) |
| **14b** | *q* | 97.73  98.10 | 111.14  114.05  115.38  116.40 |  | 121.83  123.06  123.71  124.30  *c*, *c*, *c*, *c* | 343.06 (m) | 114.96  115.23 | 35.62  36.23 | 72.46  73.21 | 70.47  70.56 | 333.01 | 196.92  196.95  203.28  203.42 | 14.64 [d, *J*(CP) = 36.0, PCH3], 17.10 [d, *J*(CP) = 32.7, PCH3], 127.00-143.10 (m, Ph) |
| **15a** | 79.55 (d)*j* | 100.16 | 115.44  115.66 | -15.15 | 123.20  123.24  *c*, *c* | 341.40 (vt)*r* | 119.54 | 49.89 | 73.33 | 67.48 | 359.52 | 215.89  222.56 | 17.06 [d, *J*(CP) = 35.4, PCH3], 20.48 [d, *J*(CP) = 33.0, PCH3], 126.90-146.90 (m, Ph) |
| **15b** | 79.47 (d)*s*  79.73 (d)*g* | 100.26 | 115.63  115.69 | -15.04 | 123.24  123.70  *c*, *c* | 341.52 (vt)*r* | 119.50 | 50.32 | 75.29 | 70.25 | 333.50 | 197.01  202.80 | 17.45 [d, *J*(CP) = 34.9, PCH3], 20.36 [d, *J*(CP) = 33.8, PCH3], 127.10-146.60 (m, Ph) |

*a* Spectra recorded in CDCl3; ** in ppm and *J* in Hz. Abbreviations: s, singlet; d, doublet; t, triplet; vt, virtual triplet; m, multiplet. *b* **(C3a,7a) = **[C3a,7a(-indenyl complex)] - **[C3a,7a(sodium indenyl)], **(C3a,7a) for sodium indenyl 130.70 ppm. *c* Overlapped by aromatic carbons. *d* 2*J*(CP) = 17.3. *e* 2*J*(CP) = 18.8. *f* 2*J*(CP) = 17.2. *g* 2*J*(CP) = 7.6. *h* 2*J*(CP) = 5.4. *i* 2*J*(CP) = *J*(CP') = 16.3. *j* 2*J*(CP) = 6.1. *k* 2*J*(CP) = *J*(CP') = 15.3. *l* 2*J*(CP) = 7.8. *m* 2*J*(CP) = 7.9. *n* 2*J*(CP) = 7.3. *o* 2*J*(CP) = *J*(CP') = 16.5. *p* 82.48-84.32 ppm (m). *q* 82.37-84.28 ppm (m). *r* 2*J*(CP) = *J*(CP') = 15.9. *s* 2*J*(CP) = 6.5.
